# Supplementary material for: Intercropping Winter Oilseed Rape (Brassica napus L.) Has the Potential to Lessen the Impact of the Insect Pest Complex
Source: MDPI journal article supplement (doi:10.3390/agronomy12030723), 2022-03-16
Supplement: s1 [file s1]

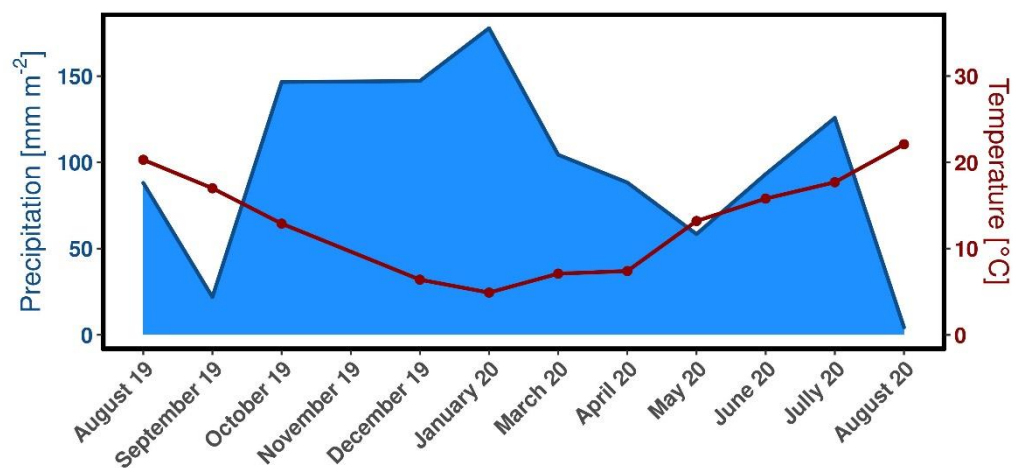

**Figure S1.** Total average precipitation (blue) and total average temperature (at 2 m high) (red) on the Agroscope research station of Changins (CH) during the duration of the experiment. The data was downloaded from the website Agrometeo ([www.agrometeo.ch](http://www.agrometeo.ch), visited on Feb 23, 2022).
